# Supplementary material for: The Interaction Effect of the Design Parameters on the Water Absorption of the Hemp-Reinforced Biocarbon-Filled Bio-Epoxy Composites
Source: MDPI journal article supplement (doi:10.3390/ijms24076093), 2023-03-23
Supplement: s1 [file s1]

# The Interaction Effect of the Design Parameters on the Water Absorption of the Hemp-Reinforced Biocarbon-Filled Bio-Epoxy Composites

Raj Kumar Dahal <sup>1</sup>, Bishnu Acharya <sup>2,\*</sup> and Animesh Dutta <sup>1,\*</sup>

<sup>1</sup> Bio-Renewable Innovation Lab, School of Engineering, University of Guelph, Guelph, ON N1G 2W1, Canada

<sup>2</sup> Department of Chemical and Biological Engineering, University of Saskatchewan, Saskatoon, SK S7N 5A9, Canada

\* Correspondence: bishnu.acharya@usask.ca (B.A.); adutta@uoguelph.ca (A.D.)

## SUPPLEMENTARY DATA

**Table S1:** The chemical and proximate analyses of the biomasses, and their biocarbon products at 450 °C, 550 °C, and 650 °C.

| In (%)    | H                | H450             | H550             | H650             | S                | S450             | S550             | S650             |
|-----------|------------------|------------------|------------------|------------------|------------------|------------------|------------------|------------------|
| Moisture  | 7.26<br>(±0.03)  | 3.17<br>(±0.01)  | 1.56<br>(±0.11)  | 1.59<br>(±0.09)  | 5.47<br>(±0.09)  | 1.19<br>(±0.10)  | 1.28<br>(±0.20)  | 0.25<br>(±0.26)  |
| VM (wet)  | 73.34<br>(±0.97) | 23.30<br>(±0.34) | 18.94<br>(±0.57) | 14.86<br>(±0.26) | 82.71<br>(±0.48) | 21.52<br>(±0.02) | 11.71<br>(±0.67) | 10.17<br>(±0.24) |
| Ash (dry) | 3.56<br>(±0.20)  | 8.29<br>(±0.36)  | 13.05<br>(±0.24) | 13.88<br>(±0.19) | 1.35<br>(±0.14)  | 10.86<br>(±0.26) | 12.47<br>(±0.03) | 8.22<br>(±0.27)  |
| FC (dry)  | 8.53             | 62.08            | 66.45            | 68.08            | 5.01             | 65.23            | 73.26            | 81.11            |
| N         | 0.35<br>(±0.05)  | 0.82<br>(±0.00)  | 0.85<br>(±0.05)  | 0.71<br>(±0.08)  | 1.41<br>(±0.08)  | 1.40<br>(±0.14)  | 1.10<br>(±0.07)  | 0.98<br>(±0.03)  |
| C         | 45.34<br>(±0.25) | 71.06<br>(±0.26) | 73.88<br>(±0.52) | 73.54<br>(±0.21) | 43.35<br>(±0.27) | 73.20<br>(±0.02) | 80.54<br>(±0.25) | 82.03<br>(±0.39) |
| H         | 5.91<br>(±0.15)  | 2.90<br>(±0.03)  | 2.16<br>(±0.01)  | 1.67<br>(±0.07)  | 5.93<br>(±0.09)  | 2.89<br>(±0.18)  | 2.35<br>(±0.05)  | 1.62<br>(±0.01)  |
| S         | 0 (±0.00)        | 0.03<br>(±0.04)  | 0<br>(±0.00)     | 0.05<br>(±0.01)  | 0.09<br>(±0.00)  | 0<br>(±0.00)     | 0<br>(±0.00)     | 0<br>(±0.00)     |
| O         | 47.05            | 14.32            | 10.64            | 15.81            | 45.66            | 14.22            | 2.95             | 1.48             |

FC= Fixed Carbon, VM= Volatile Matter, H=Hemp stalk, S=Switchgrass, H450= Biocarbon from hemp at 450 °C, H550=H Biocarbon from hemp at 550 °C, H650=Biocarbon from hemp at 650 °C, S450 = Biocarbon from switchgrass at 450 °C, S550= Biocarbon from switchgrass at 550 °C, S650= Biocarbon from switchgrass at 650 °C.

**Table S2:** Showing the average absorption coefficient and their respective water diffusion rate of hemp composite with biocarbon fillers.

| Hemp Biocarbon Composite Samples | Average Absorptivity ( $\times 10^{-6}$ (g/m <sup>2</sup> . s <sup>1/2</sup> )) | Average Diffusivity ( $\times 10^{-5}$ mm <sup>2</sup> /s) | Switchgrass Biocarbon Composite Samples | Average Absorptivity ( $\times 10^{-6}$ (g/m <sup>2</sup> . s <sup>1/2</sup> )) | Average Diffusivity ( $\times 10^{-5}$ mm <sup>2</sup> /s) |
|----------------------------------|---------------------------------------------------------------------------------|------------------------------------------------------------|-----------------------------------------|---------------------------------------------------------------------------------|------------------------------------------------------------|
| H45-50-10                        | 1.80 ( $\pm 0.244$ ) <sup>a</sup>                                               | 6.74 ( $\pm 1.178$ ) <sup>A</sup>                          | S45-50-10                               | 1.72 ( $\pm 0.031$ ) <sup>abc</sup>                                             | 5.17 ( $\pm 0.332$ ) <sup>BC</sup>                         |
| H45-50-20                        | 1.04 ( $\pm 0.129$ ) <sup>bcd</sup>                                             | 2.16 ( $\pm 0.369$ ) <sup>CD</sup>                         | S45-50-20                               | 0.80 ( $\pm 0.162$ ) <sup>d</sup>                                               | 2.14 ( $\pm 0.431$ ) <sup>D</sup>                          |
| H45-100-10                       | 1.99 ( $\pm 0.054$ ) <sup>a</sup>                                               | 7.69 ( $\pm 0.277$ ) <sup>A</sup>                          | S45-100-10                              | 1.74 ( $\pm 0.150$ ) <sup>abc</sup>                                             | 6.40 ( $\pm 0.842$ ) <sup>ABC</sup>                        |
| H45-100-20                       | 0.96 ( $\pm 0.188$ ) <sup>cd</sup>                                              | 2.54 ( $\pm 0.897$ ) <sup>CD</sup>                         | S45-100-20                              | 1.15 ( $\pm 0.084$ ) <sup>cd</sup>                                              | 4.35 ( $\pm 0.291$ ) <sup>BCD</sup>                        |
| H55-75                           | 1.62 ( $\pm 0.152$ ) <sup>ab</sup>                                              | 6.15 ( $\pm 0.841$ ) <sup>AB</sup>                         | S55-75                                  | 1.28 ( $\pm 0.308$ ) <sup>bcd</sup>                                             | 3.60 ( $\pm 1.011$ ) <sup>CD</sup>                         |
| H65-50-10                        | 1.38 ( $\pm 0.023$ ) <sup>abcd</sup>                                            | 3.46 ( $\pm 0.180$ ) <sup>BCD</sup>                        | S65-50-10                               | 1.98 ( $\pm 0.294$ ) <sup>a</sup>                                               | 7.08 ( $\pm 1.661$ ) <sup>AB</sup>                         |
| H65-50-20                        | 0.98 ( $\pm 0.115$ ) <sup>bcd</sup>                                             | 2.55 ( $\pm 0.932$ ) <sup>BCD</sup>                        | S65-50-20                               | 0.75 ( $\pm 0.145$ ) <sup>d</sup>                                               | 1.72 ( $\pm 0.493$ ) <sup>D</sup>                          |
| H65-100-10                       | 1.47 ( $\pm 0.052$ ) <sup>abc</sup>                                             | 5.14 ( $\pm 0.533$ ) <sup>ABC</sup>                        | S65-100-10                              | 2.00 ( $\pm 0.222$ ) <sup>ab</sup>                                              | 9.05 ( $\pm 0.676$ ) <sup>A</sup>                          |
| H65-100-20                       | 0.72 ( $\pm 0.007$ ) <sup>d</sup>                                               | 1.82 ( $\pm 0.139$ ) <sup>D</sup>                          | S65-100-20                              | 0.84 ( $\pm 0.118$ ) <sup>d</sup>                                               | 2.29 ( $\pm 0.157$ ) <sup>D</sup>                          |

**Table S3:** Showing the average absorption coefficient and their respective water diffusion rate of composites with and without reinforced hemp fiber and biocarbon filler.

| Samples | Average Absorptivity ( $\times 10^{-6}$ (g/m <sup>2</sup> . s <sup>1/2</sup> )) | Average Diffusivity ( $\times 10^{-5}$ mm <sup>2</sup> /s) | Average Swelling (mm/mm) % |
|---------|---------------------------------------------------------------------------------|------------------------------------------------------------|----------------------------|
| HE      | 2.41 ( $\pm 0.033$ )                                                            | 7.67 ( $\pm 0.139$ )                                       | 12.92 ( $\pm 0.251$ )      |
| HaR     | 0.17 ( $\pm 0.004$ )                                                            | 0.02 ( $\pm 0.000$ )                                       | 0.39 ( $\pm 0.023$ )       |

**Table S4:** Showing the average swelling of the biocomposite samples.

| Sample Code | Pyrolysis Temperature (°C) | Particle Size (μm) | Filler Loading (wt.%) | Hemp Biocarbon Composite Swelling % | Switchgrass Biocarbon Composite Swelling % |
|-------------|----------------------------|--------------------|-----------------------|-------------------------------------|--------------------------------------------|
| 45-50-10    | 450                        | 50                 | 10                    | 10.43 ( $\pm 0.28$ ) <sup>ab</sup>  | 10.50 ( $\pm 0.50$ ) <sup>AB</sup>         |
| 45-50-20    | 450                        | 50                 | 20                    | 7.39 ( $\pm 0.95$ ) <sup>cd</sup>   | 7.44 ( $\pm 0.32$ ) <sup>CD</sup>          |
| 45-100-10   | 450                        | 100                | 10                    | 11.07 ( $\pm 0.30$ ) <sup>a</sup>   | 11.20 ( $\pm 0.13$ ) <sup>A</sup>          |
| 45-100-20   | 450                        | 100                | 20                    | 7.77 ( $\pm 0.48$ ) <sup>bcd</sup>  | 9.01 ( $\pm 0.42$ ) <sup>BC</sup>          |
| 55-75       | 550                        | 75                 | 15                    | 9.84 ( $\pm 0.28$ ) <sup>abc</sup>  | 7.53 ( $\pm 0.71$ ) <sup>CD</sup>          |
| 65-50-10    | 650                        | 50                 | 10                    | 8.35 ( $\pm 0.12$ ) <sup>bcd</sup>  | 9.92 ( $\pm 0.62$ ) <sup>AB</sup>          |
| 65-50-20    | 650                        | 50                 | 20                    | 7.35 ( $\pm 0.29$ ) <sup>cd</sup>   | 5.56 ( $\pm 0.46$ ) <sup>E</sup>           |
| 65-100-10   | 650                        | 100                | 10                    | 8.46 ( $\pm 1.61$ ) <sup>abcd</sup> | 10.67 ( $\pm 0.47$ ) <sup>AB</sup>         |
| 65-100-20   | 650                        | 100                | 20                    | 6.23 ( $\pm 0.25$ ) <sup>d</sup>    | 6.94 ( $\pm 0.17$ ) <sup>DE</sup>          |

**Table S5:** Showing the average flexural modulus (MPa) of the hemp-composites before and after the water absorption.

| Sample Code | Pyrolysis Temperature (°C) | Particle Size (µm) | Filler Loading (wt.%) | Flexural Modulus (MPa) |                    |                       |                    |
|-------------|----------------------------|--------------------|-----------------------|------------------------|--------------------|-----------------------|--------------------|
|             |                            |                    |                       | Hemp Biocarbon         |                    | Switchgrass Biocarbon |                    |
|             |                            |                    |                       | Before                 | After              | Before                | After              |
| 45-50-10    | 450                        | 50                 | 10                    | 68.90<br>(±6.57)       | 37.85<br>(±0.535)  | 76.63<br>(±0.73)      | 43.80<br>(±1.703)  |
| 45-50-20    | 450                        | 50                 | 10                    | 81.65<br>(±8.72)       | 40.38<br>(±8.986)  | 120.59<br>(±35.72)    | 56.72<br>(±2.031)  |
| 45-100-10   | 450                        | 100                | 10                    | 61.02<br>(±2.43)       | 39.81<br>(±2.245)  | 72.01<br>(±5.43)      | 36.69<br>(±2.936)  |
| 45-100-20   | 450                        | 100                | 20                    | 95.83<br>(±18.44)      | 66.96<br>(±15.858) | 119.79<br>(±21.03)    | 59.33<br>(±3.735)  |
| 55-75       | 550                        | 75                 | 15                    | 92.51<br>(±4.13)       | 35.04<br>(±2.224)  | 100.18<br>(±5.83)     | 59.44<br>(±23.648) |
| 65-50-10    | 650                        | 50                 | 10                    | 70.57<br>(±2.51)       | 33.95<br>(±2.974)  | 63.22<br>(±10.35)     | 43.05<br>(±3.330)  |
| 65-50-20    | 650                        | 50                 | 20                    | 89.52<br>(±3.56)       | 59.57<br>(±0.305)  | 145.37<br>(±6.40)     | 74.76<br>(±6.132)  |
| 65-100-10   | 650                        | 100                | 10                    | 87.85<br>(±4.72)       | 58.69<br>(±8.085)  | 101.70<br>(±8.55)     | 47.86<br>(±7.641)  |
| 65-100-20   | 650                        | 100                | 20                    | 137.25<br>(±10.23)     | 97.29<br>(±14.011) | 141.92<br>(±19.35)    | 88.40<br>(±25.570) |

**Table S6:** Showing the average energy at break of the hemp-composites before and after the water absorption.

| Sample Code | Pyrolysis Temperature (°C) | Particle Size (µm) | Filler Loading (wt.%) | Hemp Biocarbon Composites Energy at Break (J/m <sup>2</sup> ) |                 | Switchgrass Biocarbon Composites Energy at Break (J/m <sup>2</sup> ) |                    |
|-------------|----------------------------|--------------------|-----------------------|---------------------------------------------------------------|-----------------|----------------------------------------------------------------------|--------------------|
|             |                            |                    |                       | Before                                                        | After           | Before                                                               | After              |
| 45-50-10    | 450                        | 50                 | 10                    | 87.86<br>(±4.51)                                              | 201.09 (±44.78) | 83.03<br>(±19.72)                                                    | 212.45<br>(±9.40)  |
| 45-50-20    | 450                        | 50                 | 20                    | 61.39<br>(±6.84)                                              | 176.70 (±3.82)  | 67.79<br>(±7.88)                                                     | 143.65<br>(±27.36) |
| 45-100-10   | 450                        | 100                | 10                    | 113.12<br>(±7.36)                                             | 263.20 (±49.20) | 124.94<br>(±19.89)                                                   | 236.66<br>(±8.16)  |
| 45-100-20   | 450                        | 100                | 20                    | 73.93<br>(±4.64)                                              | 165.06 (±30.70) | 78.67<br>(±16.62)                                                    | 148.85<br>(±17.43) |
| 55-75       | 550                        | 75                 | 15                    | 107.06<br>(±18.98)                                            | 206.68 (±41.29) | 96.39<br>(±22.67)                                                    | 168.11<br>(±11.83) |
| 65-50-10    | 650                        | 50                 | 10                    | 80.03<br>(±4.83)                                              | 206.38 (±35.84) | 65.46<br>(±10.27)                                                    | 219.22<br>(±5.15)  |
| 65-50-20    | 650                        | 50                 | 20                    | 72.14<br>(±3.71)                                              | 172.98 (±9.04)  | 80.94<br>(±7.35)                                                     | 149.29<br>(±46.88) |
| 65-100-10   | 650                        | 100                | 10                    | 124.80<br>(±17.29)                                            | 201.93 (±39.48) | 83.74<br>(±2.75)                                                     | 184.42<br>(±3.95)  |
| 65-100-20   | 650                        | 100                | 20                    | 78.31<br>(±26.75)                                             | 168.44 (±12.33) | 70.11<br>(±26.75)                                                    | 179.56<br>(±14.00) |

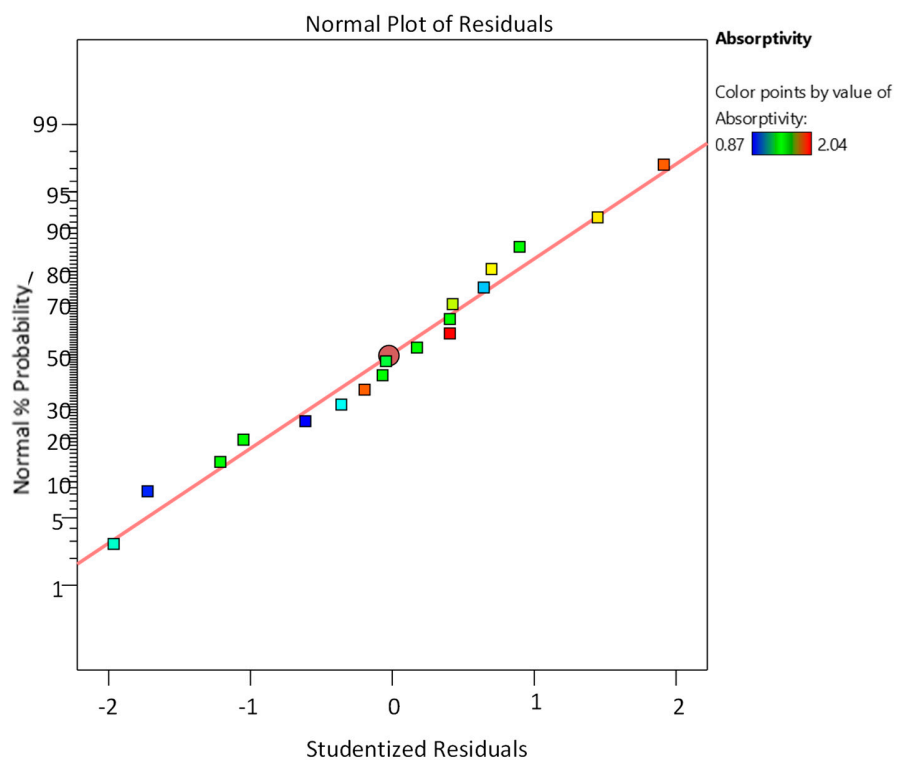

**Figure S1:** Normal probability plot of Studentized residuals of the hemp biocarbon composite's water absorptivity.

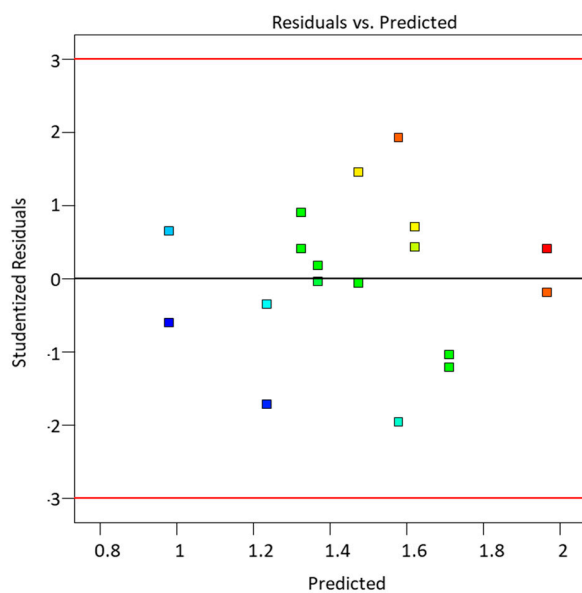

**Figure S2:** Residuals vs. predicted values of Studentized residuals of the hemp biocarbon composite's water absorptivity.

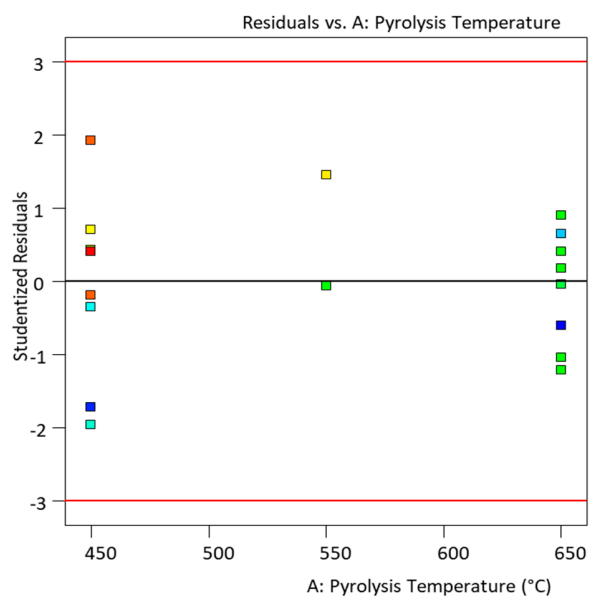

**Figure S3:** Residuals vs. pyrolysis temperature of Studentized residuals of the hemp biocarbon composite's water absorptivity.

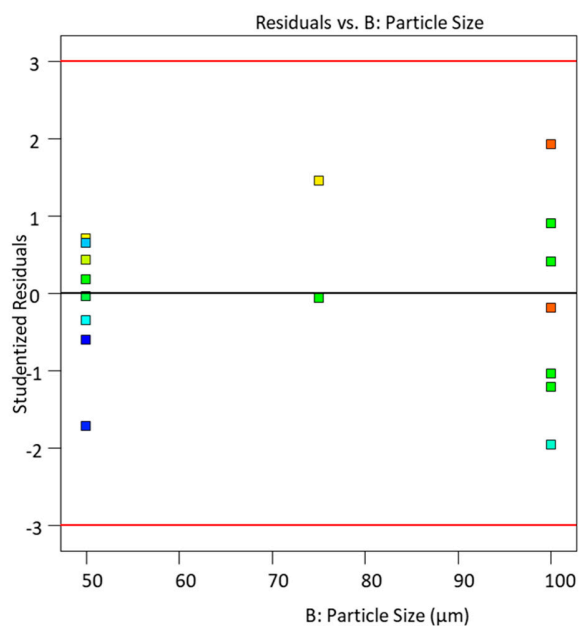

**Figure S4:** Residuals vs. particle size of Studentized residuals of the hemp biocarbon composite's water absorptivity.

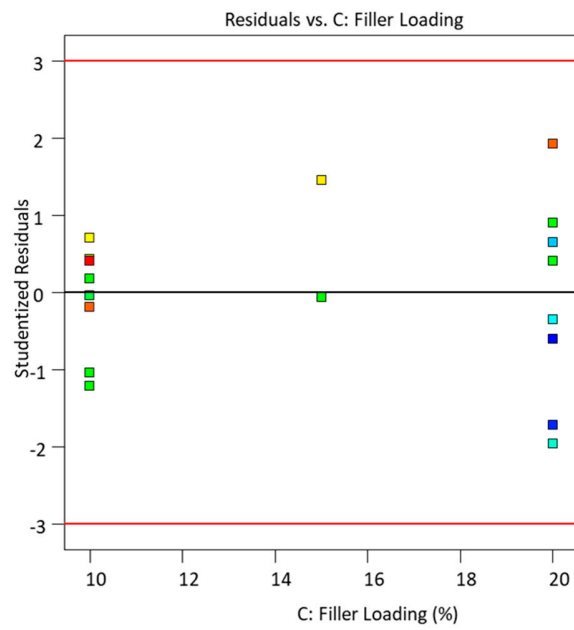

**Figure S5:** Residuals vs. filler loading values of Studentized residuals of the hemp biocarbon composite's water absorptivity.

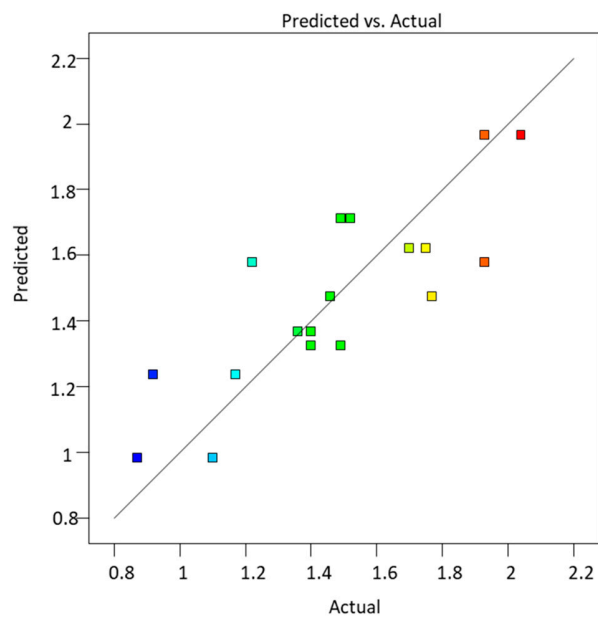

**Figure S6:** Predicted vs. actual data of the hemp biocarbon composite's water absorptivity.

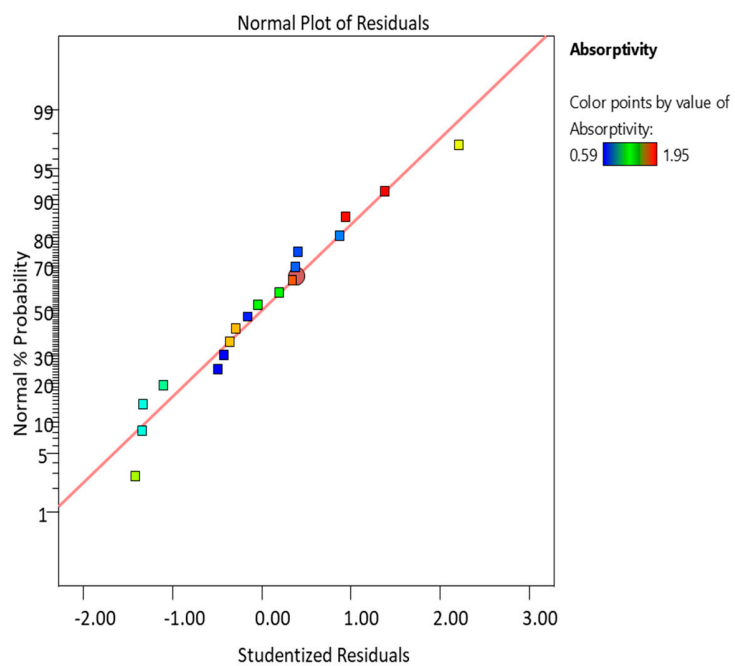

**Figure S7:** Normal probability plot of Studentized residuals of the switchgrass biocarbon composite's water absorptivity.

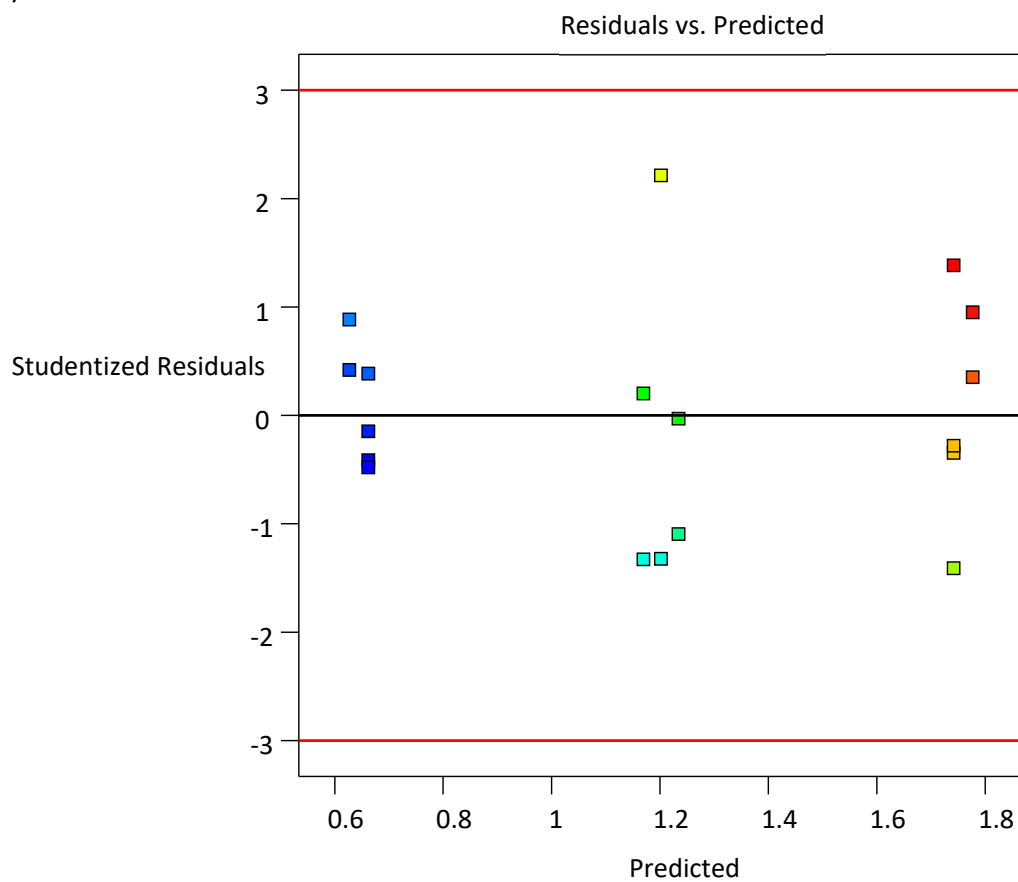

**Figure S8:** Residuals vs. predicted values plot of Studentized residuals of the switchgrass biocarbon composite's water absorptivity.



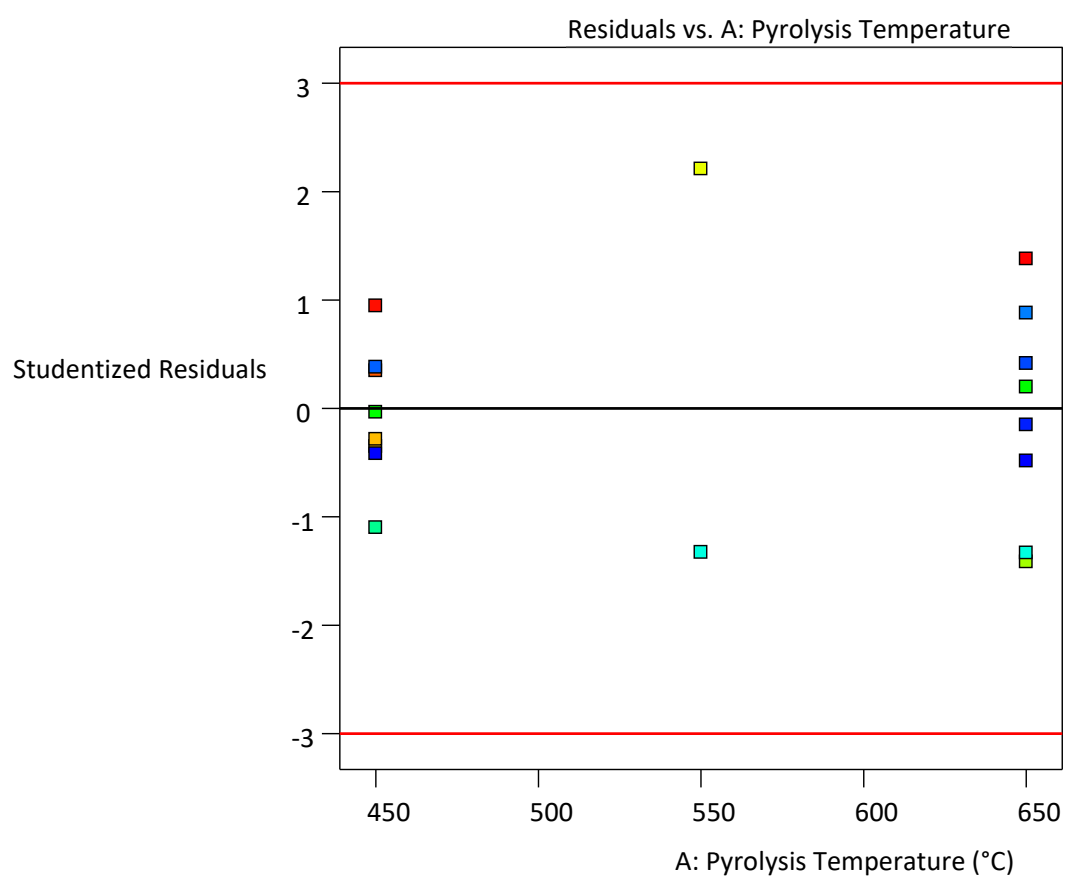

**Figure S9:** Residuals vs. pyrolysis temperature of Studentized residuals of the switchgrass biocarbon composite's water absorptivity.

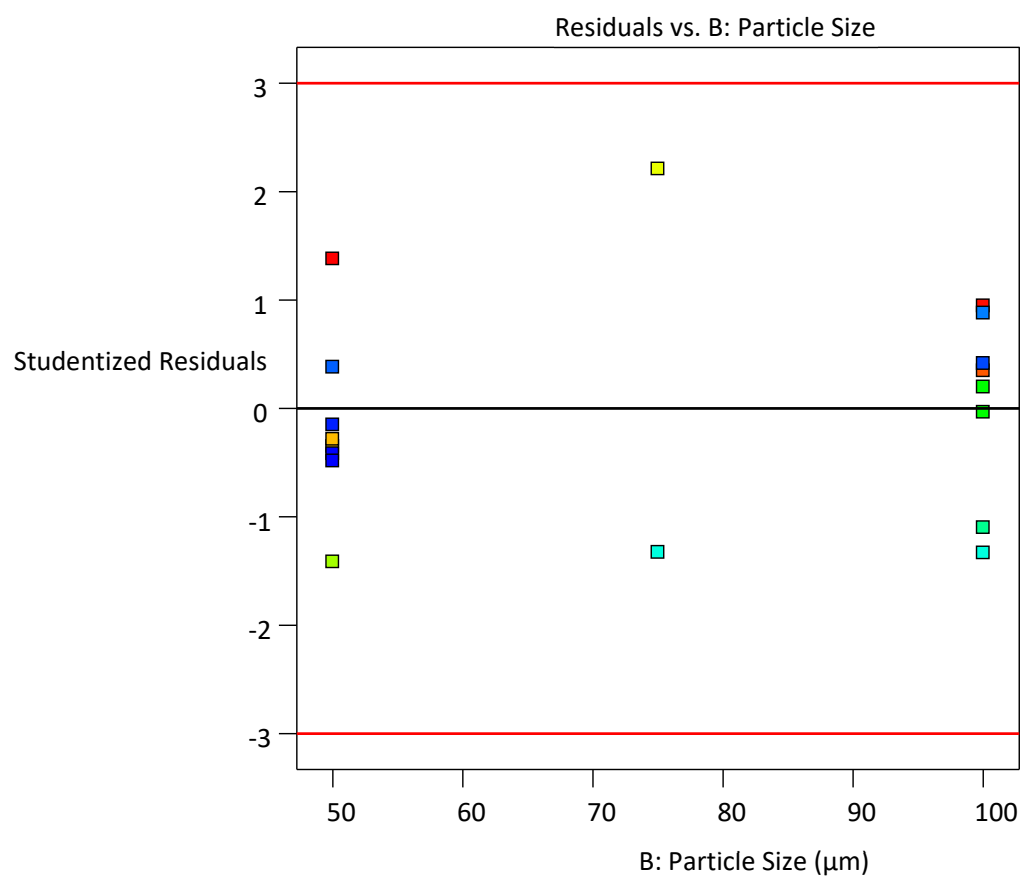

**Figure S10:** Residuals vs. particle size temperature of Studentized residuals of the switchgrass biocarbon composite's water absorptivity.

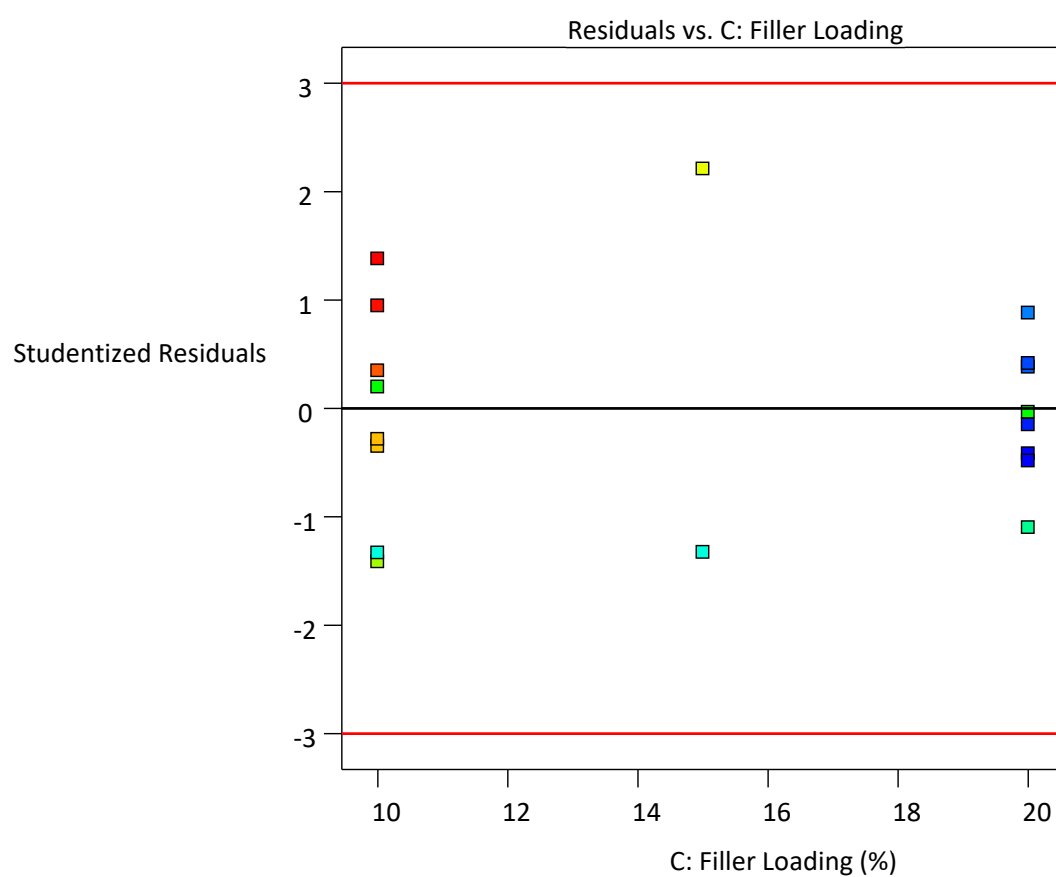

**Figure S11:** Residuals vs. filler loading of Studentized residuals of the switchgrass biocarbon composite's water absorptivity.

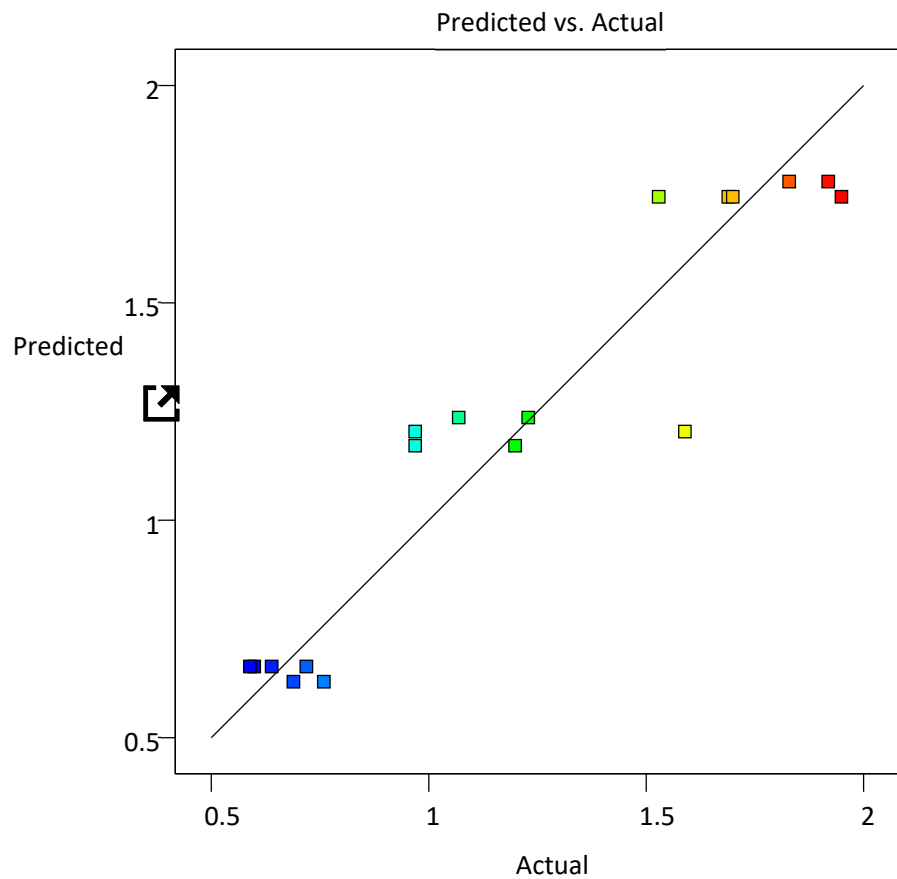

**Figure S12:** Predicted vs. actual of the switchgrass biocarbon composite's water absorptivity.

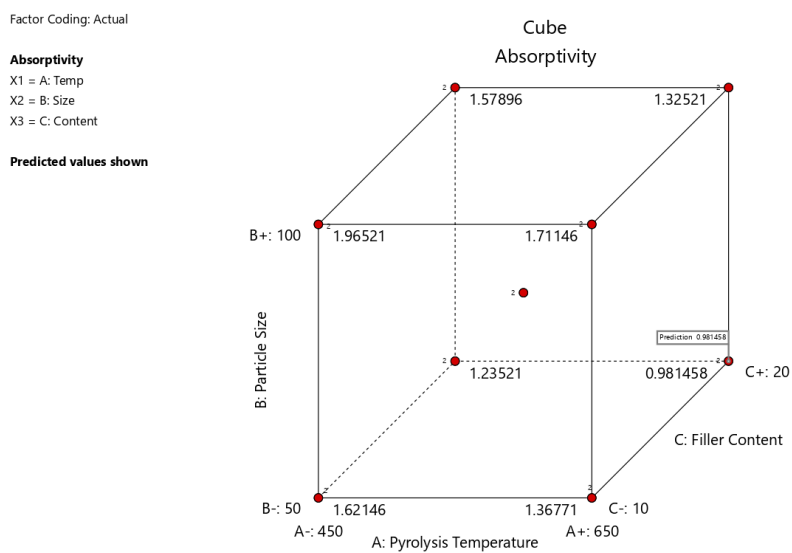

**Figure S13:** Cube plot showing all factors and the predicted water absorptivity values for the hemp biocarbon-filled hemp-reinforced polymer composites.

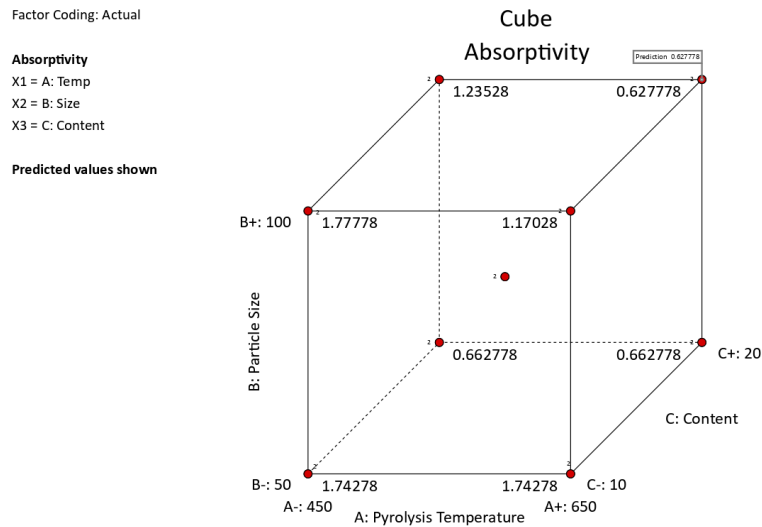

**Figure S14:** Cube plot showing all factors and the predicted water absorptivity values for the switchgrass biocarbon composites.

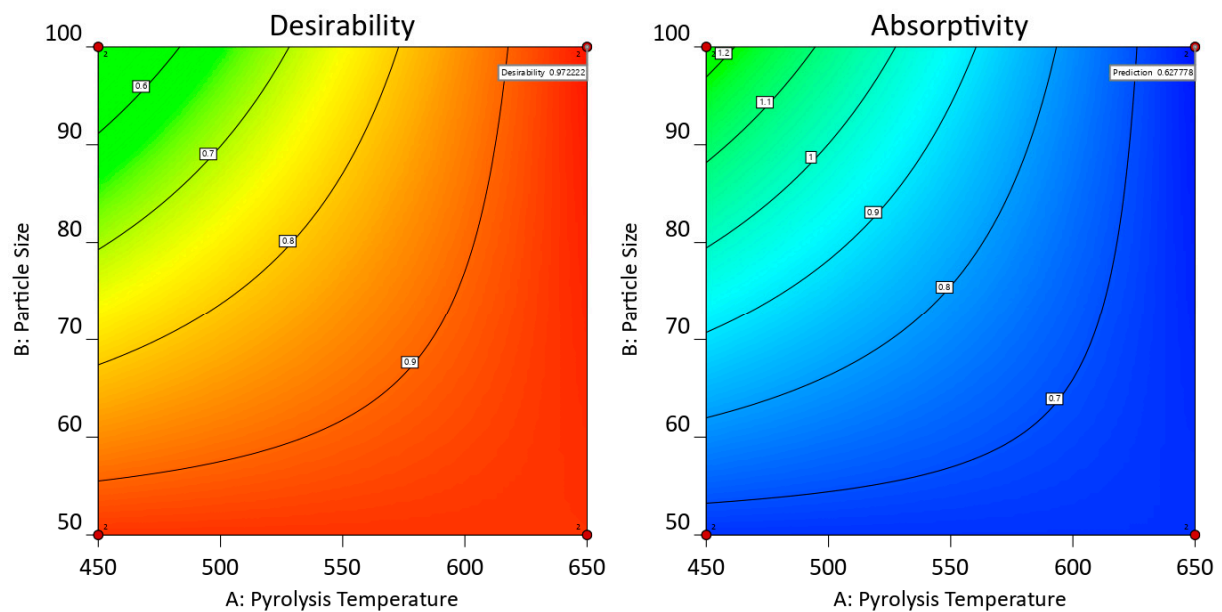

**Figure S15:** Contour plot showing the desirability of 0.972 with the predictability of 0.697 for the water absorptivity of switchgrass biocarbon-filled hemp-reinforced polymer composites when the filler loading is 20%.

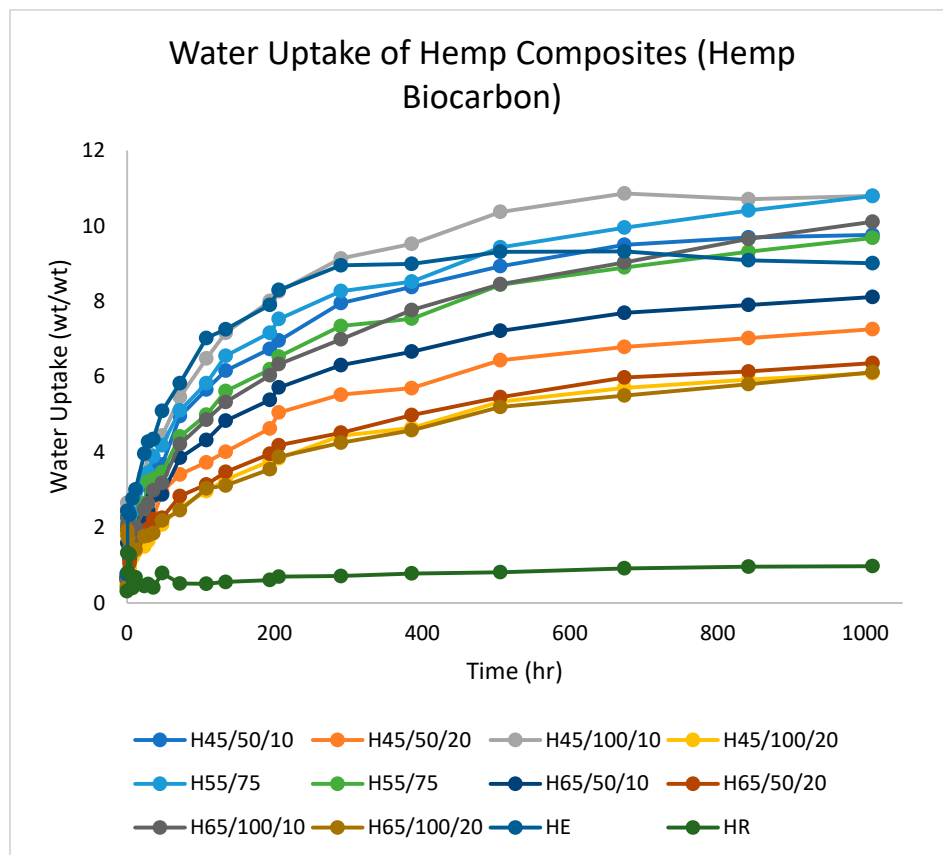

**Figure S16:** Water absorption curve of hemp composites with hemp biocarbon as a function of time (hr).

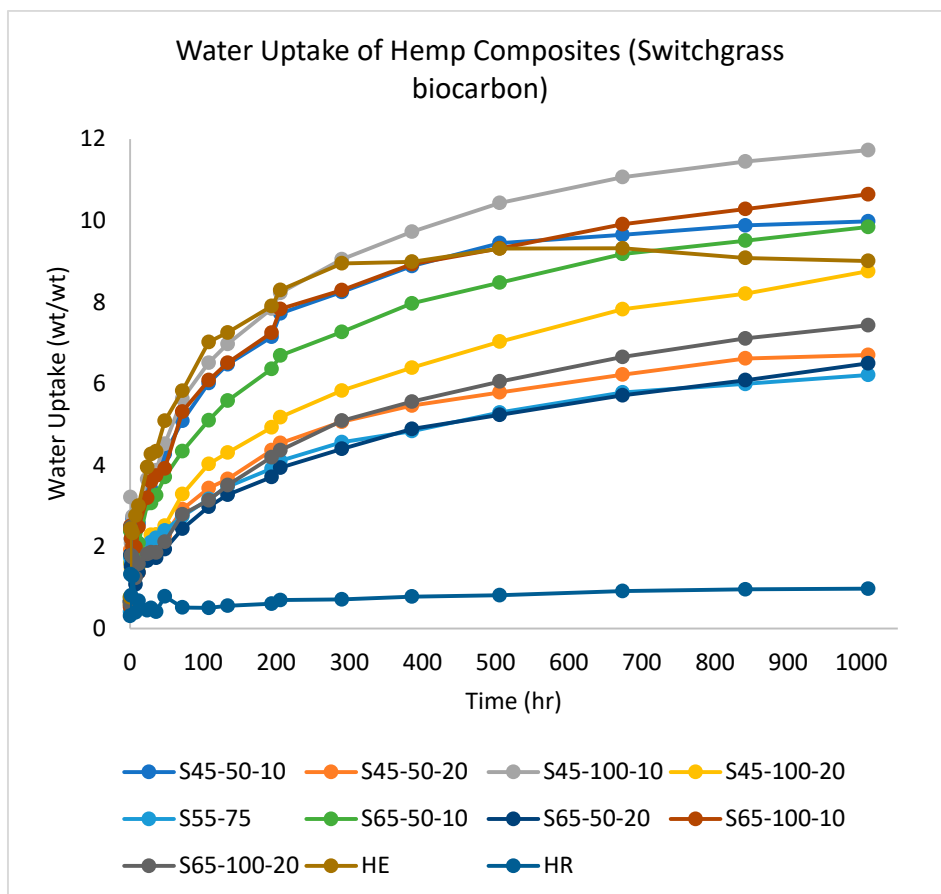

**Figure S17:** Water absorption curve of hemp composites with switchgrass biocarbon as a function of time (hr).
